# Supplementary material for: Changes of Blink Reflex in Type 2 Diabetes Mellitus
Source: J Diabetes Res. 2021 Mar 12;2021:2473193. doi: 10.1155/2021/2473193 (PMC7984919; doi:10.1155/2021/2473193)
Supplement: Supplementary Materials — The materials in the excel sheet are raw data which are used to derive the data in the tables and figures in the manuscript. [file 2473193.f1.zip › Supplementary material-2473193.xlsx]

## Sheet: Sheet1
						stimulate the right side					stimulate the left side
T2DM	sex	age	height	weight	BMI	R1-latency	IR2-latency	CR2-latency	IR2-duration	CR2-duration	R1-latency	IR2-latency	CR2-latency	IR2-duration	CR2-duration	dizziness	DSPN	DM duration	HbA1C
YES	female	73	156	61	25.07	10.4	25.1	27.6	50.2	47.7	11.1	26.1	25	56.3	61.1	NO	NO	0.1	14.6
YES	male	66	157	60	24.34	10.6	33.8	35.1	38.2	38.7	10.1	35.4	36.8	44.4	41.1	NO	NO	2	8.4
YES	male	56	172	79	26.7	12.3	39.2	39.5	39.1	38.1	11.8	37.7	36.5	36.5	41.1	YES	YES	15	7.8
YES	female	43	160	49	19.14	10.4	41.4	42.3	38	37.5	10.4	44.3	44.1	50.9	51.9	YES	NO	15	8.6
YES	male	67	164	63	23.42	10.1	29.9	30.6	53.2	49.2	10	30.3	30.6	46.5	45.5	NO	NO	6	7.6
YES	male	72	167	65	23.31	10.8	32.4	34.2	50	49.3	10.4	30.2	30.7	50.7	56.8	NO	NO	18	6.4
YES	male	52	169	68.5	23.98	11.9	38.1	39.5	34.2	32.1	10.8	40.7	39.9	32.5	32.1	YES	NO	7	6
YES	male	65	165	65	23.88	10.4	37.6	36.5	30.6	31.4	10.8	38	38	48.5	45.4	NO	NO	9	11.2
YES	male	56	158	79	31.65	10.8	33.6	33.6	46.9	45.4	11.2	34.3	32	45.4	42.6	NO	NO	15	8.2
YES	female	42	150	55	24.44	10	26.8	26	54.5	56.4	10.4	29.8	28	64.9	67.4	NO	NO	8	8.9
YES	female	68	150	36	16	10.9	33.2	36.1	56	55.3	11.2	33.4	34.3	40.1	37.7	NO	NO	15	7.3
YES	male	39	181	101	30.83	9.7	25.7	25	49.6	52.9	9.9	26.5	25.6	51.8	58.3	NO	NO	4	8.6
YES	male	44	170	75	25.95	13	42.6	40.7	29	32.6	11.1	45.8	47.2	45	45	YES	YES	5	12.2
YES	male	53	168	75	26.57	10	33.2	31.5	45.1	44.9	9.6	32.7	31	42.2	42.9	NO	NO	0.25	13.7
YES	male	75	168	70	24.8	10.4	27.2	28.7	53.7	42.2	11.1	35.9	34.2	34.6	36.6	NO	YES	11	6.3
YES	female	65	160	65	25.39	11.1	35.8	34.7	35.8	30.9	10.1	35.5	34.7	41.3	42.4	NO	NO	0.5	8.8
YES	male	30	160	73	28.52	10.3	33.6	32.3	47.3	50.2	10.9	30.1	31.9	46	46.3	NO	NO	2	8.1
YES	male	37	175	85	27.76	9.4	31.3	33.5	47.1	39.6	9.3	34.8	35.7	38.2	44.5	NO	NO	0.04	12.9
YES	female	72	156	65	26.71	11.6	36	36.5	30.6	43	10.2	32.5	32.5	46.5	48.2	YES	NO	11	8.9
YES	female	41	160	67.5	26.37	10.1	26.5	29	44.7	49.7	10.4	28.3	29.4	48.1	46.3	NO	NO	0.003	10.3
YES	male	57	169	79	27.66	11	38.4	46.5	35.8	34.1	11.5	38.3	36.6	34.8	39.1	NO	YES	25
YES	female	44	150	54	24	10.8	33.2	36	32.2	31	10.5	36.8	34.9	32.5	36.4	YES	NO	12	11.1
YES	male	62	170	60	20.76	11.2	35.8	35.4	34.3	39.4	11.7	39.1	38.1	39	36.7	NO	YES	0.005	12.7
YES	female	74	155	60	24.97	12	25.4	24.6	49.5	52.2	11.8	31.9	30.4	56.1	55.9	NO	NO	0.003
YES	male	48	171	80	27.36	11.6	35.1	35.2	46.9	46.9	11.3	32.8	34.2	48.2	44.5	NO	NO	0.17	10.9
YES	male	54	170	72	24.91	11.4	38	36	41.1	43.8	11.2	38	37.5	47.8	46.8	NO	NO	15	8
YES	male	41	176	80	25.83	10.8	34.7	33.2	24.9	25.7	11.6	33.6	32.1	29.8	28.3	NO	YES	13	7.9
YES	female	40	150	55	24.44	9.7	35	33.4	31.7	32.6	9.3	35.4	33.6	46	42.8	NO	NO	1
YES	female	61	154	70	29.52	10.3	35.6	35.8	49.8	48.5	11.5	37	38.1	41.3	43.2	NO	YES	5	10.2
YES	female	83	158	50	20.03	10.7	35.7	34.7	35.5	40.2	10	34.4	35.2	40.5	42.4	NO	NO	3	10.5
YES	female	58	150	57	25.33	10.1	35.1	35	48	44.4	10.1	34	35.4	39.5	42.5	NO	NO	7	10.2
YES	male	47	167	67	24.02	10.2	33.8	31.2	29.5	31.6	10.5	31.8	34	29.2	38.1	YES	NO	7	10
YES	female	52	154	48	20.24	10.5	26.9	25.1	36.5	37.9	11.4	31.7	30.4	37.7	43.4	NO	YES	4	11.1
YES	female	57	158	48	19.23	8.2	30	31	42.1	38	9.7	35	33	40.3	39.2	NO	NO	15	8.1
YES	male	39	168	74	26.22	12.7	30.2	30.2	46.2	36.9	10.9	33.6	32.8	45.1	39.5	NO	NO	1	10.6
YES	female	62	150	52	23.11	10.1	30.6	29.7	56.6	57.5	10.1	31.7	30.6	48.1	52.9	NO	NO	3	13.1
YES	female	53	170	84	29.07	10.6	33.5	32.7	39	41.6	11	33.5	32.6	38.8	37.5	NO	YES	6	7.7
YES	female	61	150	53	23.56	11.7	40.7	41.4	40.2	38.3	11.2	42.2	43.6	44.5	46.6	YES	YES	8	12.4
YES	female	68	153	63	26.91	11.5	33.7	33.2	42.8	40.6	11.6	35.2	35.5	47.6	46.9	NO	NO	5	10
YES	male	63	165	68	24.98	10.6	23.7	21.6	52.4	50.4	11.5	33	35.2	63	61	NO	NO	3	7.8
YES	male	54	170	65	22.49	11.7	32.4	36	55.8	47.5	12.3	38.1	36.6	50.2	49.2	NO	YES	15	9.7
YES	male	53	168	68	24.09	11.9	32.1	30.5	42.8	47.4	12.7	39.5	38.8	40.7	39.9	NO	YES	8	7.6
YES	male	34	168	76	26.93	10.8	30	31.7	55.6	48.8	10.4	34.9	32.9	47.9	50.3	NO	NO	1	12
YES	male	46	174	66	21.8	11.7	38.7	38.4	31.8	36.9	12.1	37.3	37.4	39.2	35.2	NO	YES	1	6.7
YES	female	60	161	52	20.06	11.2	37.7	38	29.7	40.7	12.3	37.3	38.8	78	69.3	NO	NO	10
YES	female	74	155	48	19.98	11.5	37.6	36.2	36.2	39.5	11.2	37.2	36.7	39.2	36.8	NO	YES	25	8.8
YES	male	52	174	59	19.49	12	30.9	30.3	55.2	57.3	11.2	39	41	43	40	NO	YES	4	10.2
YES	female	57	152	57	24.67	10.1	23.5	22	57	56.7	10.1	23.5	23.7	57.8	59.1	NO	NO	6	7.4
YES	male	70	160	67.5	26.37	11.1	44.1	42.1	32.3	32.5	10.5	38	39.9	35.1	38	YES	YES	0.25	10.9
YES	male	49	180	85	26.23	9.3	22.4	22	55.9	54.1	9.7	21.3	20.5	60.7	60.8	NO	NO	0.083	12
YES	male	55	170	65	22.49	13.1	45.1	40.9	30	30	12.3	35.4	33	44.4	44.5	YES	YES	15	7.9
YES	female	60	158	52	20.83	10.4	32.2	32.4	57.6	60.5	10.4	29.8	29.9	60	60	NO	NO	6	12.2
YES	male	64	170	65	22.49	10.9	33.1	30.4	33.7	34.8	10.6	34.9	33.5	35.9	36.2	NO	NO	3	8.1
YES	female	45	163	66	24.84	10.2	33.8	33.4	49	49.1	10.4	36.3	34.6	45.7	47.2	NO	NO	3	7.5
YES	male	68	168	72	25.51	12	25.8	23.5	60	60	12.1	26.9	31.2	60	60	NO	YES	3	10.5
YES	female	46	158	71	28.44	10.1	35.2	30.6	60	60	10.2	30.3	28.7	50	50	NO	NO	4	7.2
YES	female	70	162	58	22.1	10.8	27.2	26.5	55.2	54.4	10.1	28	25.7	51.8	56.3	NO	NO	5	6.5
YES	female	69	155	57	23.73	10.6	44	40.5	25.7	28.1	11.1	38.4	37.6	47.4	45.2	YES	YES	15
YES	male	58	175	70	22.86	10.6	48.3	45.8	36	42.6	12.8	40.6	44.5	41.4	37.3	NO	YES	9	8.2
YES	female	47	155	57.1	23.77	9.8	31.7	31.7	44	42.1	10.3	31.7	30.6	44	45.8	NO	NO	5	11.5
YES	female	39	162	79	30.1	14	43.6	41	45	27.2	12.3	40.5	38.4	30.3	35.8	NO	YES	6	14.3
YES	female	70	155	54	22.48	10	37.1	32.7	44.5	50.1	9.2	37.4	38.6	48.5	41.6	NO	YES	15	14.6
YES	female	68	153	59.5	25.42	9.4	28.8	25.8	47.9	55.1	9.6	25	25.5	63.5	63.2	NO	NO	3	9.9
YES	male	69	178	62	19.57	11.7	35.9	36.7	27.5	28.9	11.8	33.4	34.7	33.3	31.7	NO	YES	15	6.8
YES	male	45	180	78	24.07	12	36.2	37.6	45.9	41.5	11.2	32.8	34.3	54.1	54	NO	YES	1	13
YES	male	68	163	60	22.58	11.5	40.8	37.8	29.7	32.2	12	42.2	44.8	34.2	31.9	YES	YES	8	11.7
YES	male	52	161	56	21.6	9.6	33.2	33	33.9	33.1	8.6	33.2	30.6	32.8	35.4	NO	NO	0.333	12.1
YES	male	38	169	70	24.51	10.1	33.1	30.5	43.3	44.8	10.4	34.2	34.2	42.2	45.5	NO	YES	0.5	9.7
YES	male	64	157	63	25.56	9.7	33	33.4	44.7	43.7	9.7	36	33.6	43	43.6	NO	NO	25	13.4
YES	female	67	155	40	16.65	11.4	37.3	34.7	34.8	33.5	11.9	37.3	35.7	38.4	37.4	NO	YES	15	10
YES	female	54	156	65	26.71	10.4	30.8	31.7	41.5	42.5	10.8	29.5	28.3	45.4	48.9	NO	NO	15
YES	female	79	160	60	23.44	12	35	35.8	33.6	31.3	10	31.3	30.1	32.5	53.2	NO	YES		10
YES	female	67	146	46	21.58	11	33.7	35.1	37.9	37.6	11.5	30.5	29.7	38.1	30.3	NO	YES	6	10.2
YES	male	35	176	47	15.17	12.6	35.8	34.7	43.6	45.1	12.8	34.7	36.3	33.2	27.8	NO	YES	1	6.2
YES	male	40	157	70	28.4	10.4	30.2	28	32.8	38	10.1	31.7	31.6	39.2	37.8	NO	NO	0.333	10.5
YES	male	57	170	62	21.45	10.8	32	33.3	38.1	36.1	11.2	30.7	34.1	40.9	34.1	NO	YES	4	8.3
YES	male	70	177	72	22.98	10.3	32.9	30.7	41.7	30.8	10.7	30.8	31.6	40	39.2	NO	YES	0.041	9.5
YES	male	65	158	65	26.04	10.1	30.9	30.2	42.7	47.2	10.1	29	28.2	44.6	43.8	NO	NO	1	6.7
YES	male	25	170	79	27.34	10.1	25.7	26.3	43.7	46.6	10.1	26.5	25.8	47.3	52.6	NO	NO	1	10.2
YES	male	47	176	63	20.34	10.9	36.5	34	34.3	38.3	11.3	36.5	39.2	39.6	41.7	NO	YES	10	4.8
YES	male	47	174	83	27.41	11.3	31.3	32.5	35.7	31.8	11	35	37.3	33.7	35.1	NO	NO	0.083	11.9
YES	male	60	168	71	25.16	10.2	39.2	39.6	49.2	47.1	9.7	34.3	35.8	49	44.9	NO	YES	3	8.5
YES	female	65	158	55	22.03	11.2	45.6	43.5	21.7	20.5	12.7	35.7	38.6	37.8	38.6	YES	YES	0.03	10.5
YES	female	55	163	60	22.58	10.1	27.2	25.1	85.1	69.7	10	25.6	23.2	80	80	NO	NO	0.04	9.4
YES	female	62	172	71	24	11.5	36.3	34.2	37.9	40.4	11.2	35.1	36.4	36.5	41.9	NO	YES	25	11
YES	female	61	152	46	19.91	11	33.9	32.1	34.7	36.9	11.2	27.8	26.2	22.2	37.9	NO	YES	15	9.2
YES	female	42	156	52.5	21.57	10.1	33.4	32	37.1	39.6	10.1	36.9	35.4	35.1	34.3	NO	YES	5
YES	female	40	162	61	23.24	10.2	28.3	29.1	42.5	42.5	10.4	31	30.2	48.1	48.9	NO	NO	12	10.9
YES	female	49	160	64	25	10.1	31.2	35.8	47.1	41.4	10.4	31.7	32.1	39.9	42.6	NO	NO	4	5.8
YES	male	44	165	70	25.71	8.9	32.1	30.2	46.6	48.8	9.7	35	30.9	48.5	53	NO	NO
YES	male	48	159	62	24.52	10.4	30.9	30.6	38.5	38.4	10.4	28	29.8	36.5	45.5	NO	NO	0.17	12.6
YES	female	79	149	54	24.32	11.3	29.1	29.4	41	41.4	11.1	38	37.7	29.9	31.7	NO	NO	0.25	12
YES	male	49	170	69	23.88	11.4	30.1	29.7	37.5	35.6	11.6	35.4	37.4	46.7	42.4	NO	NO	0.5	7.2
YES	female	39	162	58	22.1	9.8	35	34.3	38.5	35.8	10.4	33.9	35.6	41.2	42.7	NO	NO	10	10
YES	male	50	163	55	20.7	10.8	38	37.3	40	40	11.9	36.5	36.6	39.9	39.8	NO	NO	0.5	6
YES	female	62	154	55	23.19	10.6	29.5	24.5	33.1	36.6	10.3	35.1	34.7	35	36.5	NO	YES	5	19
YES	male	30	165	72	26.45	9.7	30.6	29.8	41	31.3	9.7	28.3	29.1	50.7	46.6	NO	NO	0.5	10.8
YES	male	45	171	79	27.02	10.4	33.9	32.8	44.8	47.4	11.2	29.8	29.1	48.4	48.3	NO	YES	0.17	13.2
YES	female	47	146	48	22.52	9.8	38	36.1	45.5	43.3	10.4	33.7	30.8	43.9	43.4	NO	YES	3	12.4
YES	male	62	168	73	25.86	10.6	22.1	21.6	42.1	38.5	10.4	23.9	24.3	38.4	43.2	NO	NO	3	7
YES	female	48	158	60	24.03	10.4	29.5	29.8	40.6	44.8	10.4	33.9	34.4	46.3	46.5	NO	NO	7	8.5
YES	male	57	172	55	18.59	12.7	39.1	38.8	42.5	43.9	12.6	37.1	37.8	43.2	37.5	NO	YES	4	15.3
YES	male	50	170	55	19.03	10	25.7	23.5	42.9	45.9	10.8	33.5	33.1	40.7	41.7	NO	NO	3	7.2
YES	female	65	158	66	26.44	11.3	29.5	29.8	35	39.6	10.8	25.7	26.2	35.1	33.5	NO	NO	15	6.8
YES	female	64	155	64	26.64	11	27	27.2	36.5	35.3	11.8	35.4	34.8	39.3	34.9	NO	YES	16
NO	female	68				10.5	34.7	36.5	45.5	44.4	9.7	35.8	33.6	44	48.5
NO	female	53				8.9	26.2	24.7	47.3	47.3	9.6	25.7	25.3	42.2	48.2
NO	female	76				10.2	28.7	29.1	35.8	37.8	10.1	27.2	26.4	26.7	29.9
NO	female	52				9.4	28.8	30	51	55.3	9.7	30.7	31	44.9	47.5
NO	male	53				9.7	30	31.8	32.6	33.5	10	30.5	31.1	37.4	32.3
NO	female	54				10.8	30.1	32.9	54.4	49.5	10	30.3	32.8	41	48.1
NO	male	41				10.1	29.5	31.2	44.3	40.4	9.3	30	30.7	39.9	40.9
NO	female	67				9.9	30.9	30.6	52.2	54.5	9.7	32.9	31.8	43.9	44.4
NO	male	59				10.4	29.2	28.6	43.6	43.4	9.6	28.3	29.1	34.1	40.3
NO	male	58				10.1	34.7	35.6	50	50.2	9.5	35	33.9	51.6	56
NO	male	40				9.6	35.4	35.7	47.4	41.9	10.3	33.8	32.1	33.2	32.4
NO	female	50				8.7	26.3	25.8	40.8	50.3	8.9	27	27	46.5	40.9
NO	male	45				8.6	30.6	30.9	44	47.8	8.2	29.1	29.5	44.4	46.9
NO	female	52				9.7	25.4	25.1	45.1	48.7	10.8	25.1	26	43.9	43.7
NO	female	40				10.4	29.8	28.8	38.9	31.6	10.4	29	29.5	33.2	36.5
NO	female	65				9.7	36.2	36.5	28.7	29.1	9.7	36.5	36.1	28.4	29.9
NO	female	55				10.7	27.6	29.7	44.5	49.3	10.1	26.6	26.5	42.3	42
NO	female	56				9.3	33.6	32.3	44	44.9	9.2	29.1	30	47	49.9
NO	female	64				9.7	26.1	24.3	58.5	62.2	9.3	22.7	24.1	45.9	43.4
NO	male	51				9.7	32.5	33.9	36.5	39.9	8.9	35.8	35	37.3	42.9
NO	female	42				8.9	30.6	30.2	33.2	32.1	8.9	30.6	30.9	39.1	37
NO	female	61				9.4	31.7	32.8	36.2	35.8	9.4	30.2	29.2	39.2	46.5
NO	male	44				10.4	30.2	31	42.1	41.7	9.9	32	30.6	45.6	45.8
NO	male	61				9.3	33.8	34	34.4	34.6	9.9	37.6	38.5	36.2	33
NO	male	53				9.3	24	24.9	44.7	39.6	8.9	25.7	24.3	52.6	55.1
NO	male	43				9.9	32.8	33	44.8	40.9	10.1	34.3	32	38.4	41.8
NO	female	52				10.1	30	31.2	53.5	50.1	9.4	27	27.7	45.6	45
NO	male	56				10.1	31.5	30.7	46	48	10.8	32.8	32.7	46.3	43.7
NO	female	53				10.4	30	30.6	65	62.4	10	34.7	35.6	55.5	53.6
NO	female	53				9.8	30.6	30.1	42.6	47.1	9.3	31.4	29.7	43.2	42.3
NO	male	62				9.2	31	31.7	49.3	48.2	9.3	34.7	35.9	39.7	41.6
NO	female	61				10	27.6	26.7	45.9	45.1	10.4	24.2	24.6	48.1	48.1
NO	male	35				10.1	30	30.2	31.1	30.2	9.7	28.7	25	31	38
NO	male	55				9.7	32.8	33.6	37.7	39.1	10.1	30.6	30.9	36.9	39.6
NO	female	49				10.4	32.1	30.2	54.4	59.7	10.4	31.7	31.8	45.9	52.1
NO	female	43				8.9	33.9	34	39.9	39.5	9.3	33.9	33.2	39.6	42.5
NO	female	56				8.9	28	26	42.8	44.8	8.6	26.3	26.6	40.4	40.9
NO	female	71				9.3	25.4	25.4	54.3	51.8	8.9	23.4	21.6	62	57.8
NO	female	55				11.6	31.4	31.4	44.7	43.9	10.4	30.5	29.5	48.2	49.9
NO	female	49				10.3	27.6	27.6	46.2	47	9.7	27.3	26.5	52.5	50.7
NO	male	42				9.8	31.7	30.4	45.5	46	10	32.3	33.6	48.2	44.3
NO	male	41				9.7	25.7	23.9	54.5	52.9	9	25	24.6	58.1	52.9
NO	female	47				10.4	24.7	23.5	44.7	46.1	10.5	25	25	42.1	40
NO	female	47				10.1	23.1	22.4	49.6	51.1	10.1	28.3	26.5	45.5	50.3
NO	female	61				9.7	24.5	26.2	51.9	52.5	10.2	23.5	21.6	63.1	57
